# Supplementary material
Source: publisher figshare collection journal article supplement (https://tandf.figshare.com/ndownloader/files/22648766)
Supplement: Supplementary file 1 [file 22648766]

## Sheet: Sheet1
Taxon	Locality	Voucher	Sample	Genbank	Reference
Daphoenositta chrysoptera leucocephala	Shoalwater Bay, Qld, Australia	ANWC B43773	fresh tissue	MK286014	This study
Daphoenositta chrysoptera leucocephala	Dawes Range Plateau, Qld, Australia	ANWC B43485	fresh tissue	MK286015	This study
Daphoenositta chrysoptera striata	Palmer R, Cape York, Qld, Australia	ANWC B29701	fresh tissue	MK286016	This study
Daphoenositta chrysoptera striata	Weipa, Cape York, Qld, Australia	ANWC B29806	fresh tissue	MK286017	This study
Daphoenositta chrysoptera leucoptera	Mataranka, NT, Australia	ANWC B34034	fresh tissue	MK286018	This study
Daphoenositta chrysoptera chrysoptera	Captains Flat, NSW, Australia	ANWC B34552	fresh tissue	MK286019	This study
Daphoenositta chrysoptera chrysoptera	Waterloo State Forest, Vic, Australia	ANWC B45017	fresh tissue	MK286020	This study
Daphoenositta chrysoptera pileata	Mount Barker WA, Australia	ANWC B29147	fresh tissue	MK286021	This study
Daphoenositta chrysoptera pileata	Eyre Peninsula, SA, Australia	ANWC B48471	fresh tissue	MK286022	This study
Daphoenositta papuensis papuensis	Arfak, Bird's Head, New Guinea	AMNH 293794	toepad	MK286023	This study
Daphoenositta papuensis papuensis	Arfak, Bird's Head, New Guinea	AMNH 684444	toepad	MK286024	This study
Daphoenositta papuensis intermedia	Enarotali, Western Ranges, New Guinea	NRM 571826	toepad	MK286025	This study
Daphoenositta papuensis toxopeusi	Bele River, 18 km n Lake Habbemma, Western Ranges, New Guinea	AMNH 342335	toepad	MK286026	This study
Daphoenositta papuensis toxopeusi	Bele River, 18 km n Lake Habbemma, Western Ranges, New Guinea	AMNH 342336	toepad	MK286027	This study
Daphoenositta papuensis alba	Awande, Eastern Ranges, New Guinea	AMNH 816490	toepad	MK286028	This study
Daphoenositta papuensis alba	Mt Giluwe, Eastern Ranges, New Guinea	BMNH 1953.17.234	toepad	MK286029	This study
Daphoenositta papuensis wahgiensis	Kubor Range, Eastern Ranges, New Guinea	ANWC B02455	toepad	MK286030	This study
Daphoenositta papuensis wahgiensis	Kubor Range, Eastern Ranges, New Guinea	ANWC B02407	toepad	MK286031	This study
Daphoenositta papuensis albifrons	Efogi, 30 km east of Port Moresby, SE Peninsula, New Guinea	ANWC B09122	toepad	MK286032	This study
Daphoenositta papuensis albifrons	Mt Albert Edward, SE Peninsula, New Guinea	AMNH 816495	toepad	MK286033	This study
Daphoenositta papuensis albifrons	Bihagi, head of Mambare River, SE Peninsula, New Guinea	AMNH 684452	toepad	MK286034	This study
Daphoenositta miranda frontalis	9 km NEN Lake Habbema, Western Ranges, New Guinea	AMNH 342325	toepad	MK286035	This study
Daphoenositta miranda frontalis	18 km SW Bernhard Camp, Idenburg River, Western Ranges, New Guinea	AMNH 342317	toepad	MK286036	This study
Daphoenositta miranda kuboriensis	Mt. Kominjim, Schrader Mts., Eastern Ranges, New Guinea	AMNH 792828	toepad	MK286037	This study
Daphoenositta miranda kuboriensis	Mt Giluwe, Eastern Ranges, New Guinea	BMNH 1953.17.233	toepad	MK286038	This study
Daphoenositta miranda miranda	Mt. Tafa, SE Peninsula, New Guinea	RMNH.AVES.131690	toepad	MK286039	This study
Daphoenositta miranda miranda	Mt Scratchley, SE Peninsula, New Guinea	BMNH 97.4.20.3	toepad	MK286040	This study
Aleadryas rufinucha rufinucha	Vogelkop, Bird's Head, New Guinea	NRM 572137	toepad	MK286041	This study
Aleadryas rufinucha rufinucha	Vogelkop, Bird's Head, New Guinea	NRM 572136	toepad	MK286042	This study
Aleadryas rufinucha niveifrons	Mt Wilhelm, Eastern Ranges, New Guinea	NHMD 138669	fresh tissue	MK286043	This study
Aleadryas rufinucha niveifrons	Mt Wilhelm, Eastern Ranges, New Guinea	NHMD 164651	fresh tissue	MK286044	This study
Aleadryas rufinucha lochmia	Rawlinson/Saluwaket Mts., Huon Peninsula, New Guinea	ANWC B25831	toepad	MK286045	This study
Aleadryas rufinucha lochmia	Teptep, Finisterre Range, Huon Peninsula, New Guinea	BMNH 1978.9.7	toepad	MK286046	This study
Aleadryas rufinucha lochmia	Huon Peninsula, New Guinea	NHMD 263805	fresh tissue	MK286047	This study
Aleadryas rufinucha gamblei	Near Wau, SE Peninsula, New Guinea	CEM35	fresh tissue	EF592289	Dumbacher et al. 2008
Aleadryas rufinucha gamblei	Owen Stanley Mts., SE Peninsula, New Guinea	BMNH 1913.3.6.336	toepad	MK286048	This study
Ornorectes cristatus arthuri	4 km sw Bernhard Camp, Idenburg River, Western Ranges, New Guinea	AMNH 341801	toepad	MK286049	This study
Ornorectes cristatus cristatus	Arfak Mts., Bird's Head, New Guinea	BMNH 79.6.3.2	toepad	MK286050	This study
Ornorectes cristatus cristatus	Iwaka River, S Lowlands, New Guinea	BMNH 1916.5.30.123	toepad	MK286051	This study
Ornorectes cristatus kodonophonos	Oro Province, SE Peninsula, New Guinea	ANWC B26733	fresh tissue	GQ494087	Jønsson et al. 2010
Ornorectes cristatus kodonophonos	Variata NP, SE Peninsula, New Guinea	ABBBS 062-20027	fresh tissue	EF592299	Dumbacher et al. 2008
Ornorectes cristatus kodonophonos	Lake Kutubu Station, S Lowlands, New Guinea	ANWC B01393	toepad	MK286052	This study
Paramythia montium olivacea	4 miles east of Wilhelmina summit, Western Ranges, New Guinea	AMNH 343297	toepad	MK286053	This study
Paramythia montium olivacea	9 km NE Lake Habbema, Western Ranges, New Guinea	AMNH 343281	toepad	MK286054	This study
Paramythia montium montium	Mt Wilhelm, Eastern Ranges, New Guinea	NHMD 138772	fresh tissue	MK286055	This study
Paramythia montium montium	Mt Wilhelm, Eastern Ranges, New Guinea	NHMD 138733	fresh tissue	MK286056	This study
Paramythia montium brevicauda	Wasaunon, Huon Peninsula, New Guinea	NHMD 263804	fresh tissue	MK286057	This study
Cinclosoma ajax ajax	Waylandgeb, Western Ranges, New Guinea	AMNH 302681	toepad	MK286058	This study
Cinclosoma ajax ajax	Waylandgeb, Western Ranges, New Guinea	AMNH 302683	toepad	MK286059	This study
Cinclosoma ajax muscale	5 miles below Palmer Junction, Upper Fly River, S Lowlands, New Guinea	AMNH 426483	toepad	MK286060	This study
Cinclosoma ajax muscale	5 miles below Palmer Junction, Upper Fly River, S Lowlands, New Guinea	AMNH 426484	toepad	MK286061	This study
Cinclosoma ajax alare	Wassi Kussa River, Tarara, Trans-Fly, New Guinea	AMNH 426478	toepad	MK286062	This study
Cinclosoma ajax goldiei	Astrolabe Range, SE Peninsula, New Guinea	ANWC B09039	toepad	JN620459	Toon et al 2012
Cinclosoma ajax goldiei	Astrolabe Range, SE Peninsula, New Guinea	ANWC B08934	toepad	JN620458	Toon et al 2012
Pachycephala rufiventris minor	Melville Island, NT, Australia	ANWC B48538	fresh tissue	MK286063	This study
Pachycephala rufiventris falcata	n NT, Australia	ANWC B33455	fresh tissue	MK286064	This study
Pachycephala rufiventris falcata	n NT, Australia	ANWC B33428	fresh tissue	MK286065	This study
Pachycephala rufiventris pallida	Cape York, Australia	UWBM 57510	fresh tissue	KP169627	Andersen et al. 2014
Pachycephala rufiventris pallida	Cape York, Australia	ANWC B29820	fresh tissue	MK286066	This study
Pachycephala rufiventris rufiventris	Alice Springs, NT, Australia	MV 4205	fresh tissue	GQ494083	Jønsson et al. 2010
Pachycephala rufiventris rufiventris	Shark Bay area, c WA, Australia	KUNHM 6174	fresh tissue	KP169648	Andersen et al. 2014
Pachycephala rufiventris rufiventris	SA, Australia	ANWC B46667	fresh tissue	MK286067	This study
Pachycephala rufiventris xanthetraea	New Caledonia	BMNH 1969.41.1179	toepad	MK286068	This study
Pachycephala rufiventris xanthetraea	New Caledonia	BMNH 88.5.3.309	toepad	MK286069	This study
Pachycephala monacha monacha	Aru Islands, New Guinea	BMNH 1910.12.28.253	toepad	MK286070	This study
Pachycephala monacha lugubris	Kubor Range, Eastern Ranges, New Guinea	ANWC B02443	toepad	MK286071	This study
Pachycephala monacha lugubris	Milne Bay, SE Peninsula, New Guinea	ANWC B08239	toepad	MK286072	This study
Pachycephala leucogastra leucogastra	Central Province, SE Peninsula, New Guinea	AMNH 659279	toepad	MK286073	This study
Pachycephala leucogastra leucogastra	Central Province, SE Peninsula, New Guinea	AMNH 659281	toepad	MK286074	This study
Pachycephala leucogastra meeki	Rossel, SE Islands, New Guinea	SNZP TKP2004065	fresh tissue	KP169659	Andersen et al. 2014
Pachycephala leucogastra meeki	Rossel, SE Islands, New Guinea	SNZP TKP2004067	fresh tissue	KP169505	Andersen et al. 2014
Pachycephala arctitorquis kebirensis	Romang Island, Wallacea	BMNH 1904.7.21.43	toepad	MK286075	This study
Pachycephala arctitorquis kebirensis	Romang Island, Wallacea	NRM 552152	toepad	MK286076	This study
Pachycephala lanioides carnarvoni	30 km W of Karratha, WA, Australia	ANWC B33208	fresh tissue	KC540324	Nyari & Joseph 2013
Pachycephala lanioides carnarvoni	N of De Grey Station Homestead, WA, Australia	ANWC B33078	fresh tissue	KC540320	Nyari & Joseph 2013
Pachycephala lanioides lanioides	King Sound, NW of Derby, WA, Australia	ANWC B50489	fresh tissue	KC540334	Nyari & Joseph 2013
Pachycephala lanioides lanioides	Mary Island South, King Sound, NW of Derby, WA, Australia	ANWC B50512	fresh tissue	KC540336	Nyari & Joseph 2013
Pachycephala lanioides fretorum	Qld, Australia	ANWC B29494	fresh tissue	KC540313	Nyari & Joseph 2013
Pachycephala lanioides fretorum	Qld, Australia	ANWC B32677	fresh tissue	KC540314	Nyari & Joseph 2013
Pachycephala schlegelii schlegelii	Tombrok, Bird's Head, New Guinea	NRM 543645	toepad	MK286077	This study
Pachycephala schlegelii schlegelii	Sorong, Bird's Head, New Guinea	NRM 543646	toepad	MK286078	This study
Pachycephala schlegelii cyclopum	Cyclops Mountains, NW Lowlands, New Guinea	AMNH 658319	toepad	MK286079	This study
Pachycephala schlegelii cyclopum	Cyclops Mountains, NW Lowlands, New Guinea	AMNH 658324	toepad	MK286080	This study
Pachycephala schlegelii cyclopum	Mt. Menawa, Sepik-Ramu, New Guinea	AMNH 829729	toepad	MK286081	This study
Pachycephala schlegelii obscurior	Northern Oro Province, close to Port Moresby, New Guinea	ANWC B24574	fresh tissue	GQ494084	Jønsson et al. 2010
Pachycephala soror soror	Bivak October (Arfak Mts.), Bird's Head, New Guinea	NRM 543652	toepad	MK286082	This study
Pachycephala soror soror	Bivak October (Arfak Mts.), Bird's Head, New Guinea	NRM 543651	toepad	MK286083	This study
Pachycephala soror klossi	West Sepik Province, Sepik-Ramu, New Guinea	KUNHM 7888	fresh tissue	KP169512	Andersen et al. 2014
Pachycephala soror klossi	Muller Range, Border Ranges, New Guinea	ANWC B52556	fresh tissue	MK286084	This study
Pachycephala soror octogenarii	Kumawa Mountains, Bird's Neck, New Guinea	AMNH 836525	toepad	MK286085	This study
Pachycephala soror bartoni	Northern Oro Province, SE Peninsula, New Guinea	ANWC B26736	fresh tissue	GQ494086	Jønsson et al. 2010
Pachycephala soror remota	Goodenough Island, SE Islands, New Guinea	AMNH 658278	toepad	MK286086	This study
Pachycephala soror remota	Goodenough Island, SE Islands, New Guinea	AMNH 388847	toepad	MK286087	This study
Pseudorectes ferrugineus leucorhynchus	Waigeo Island, NW Islands, New Guinea	AMNH 300946	toepad	MK286088	This study
Pseudorectes ferrugineus leucorhynchus	Waigeo Island, NW Islands, New Guinea	BMNH 81.5.1.4422	toepad	MK286089	This study
Pseudorectes ferrugineus fuscus	Batanta, NW Islands, New Guinea	AMNH 789550	toepad	MK286090	This study
Pseudorectes ferrugineus fuscus	Batanta, NW Islands, New Guinea	AMNH 789549	toepad	MK286091	This study
Pseudorectes ferrugineus brevipennis	Aru Islands, New Guinea	BMNH 1907.12.11.131	toepad	MK286092	This study
Pseudorectes ferrugineus brevipennis	Aru Islands, New Guinea	BMNH 85.3.10.86	toepad	MK286093	This study
Pseudorectes ferrugineus ferrugineus	Salawati Island, NW Islands, New Guinea	BMNH 1934.10.21.158	toepad	MK286094	This study
Pseudorectes ferrugineus ferrugineus	Sorong, Bird's Head, New Guinea	NRM 572140	toepad	MK286095	This study
Pseudorectes ferrugineus holerythrus	Japen, New Guinea	NRM 572139	toepad	MK286096	This study
Pseudorectes ferrugineus clarus	Mt Wilhelm, Eastern Ranges, New Guinea	NHMD 138769	fresh tissue	MK286097	This study
Pseudorectes ferrugineus clarus	Kakoro Village, Gulf Province, Papua New Guinea	ABBBS 062-38818	fresh tissue	EF592305	Dumbacher et al. 2008
Pseudorectes ferrugineus clarus	Kakoro Village, Gulf Province, Papua New Guinea	ABBBS 062-38823	fresh tissue	EF592306	Dumbacher et al. 2008
Melanorectes nigrescens nigrescens	Tombrok, Bird's Head, New Guinea	NRM 572141	toepad	MK286098	This study
Melanorectes nigrescens nigrescens	Bivak October (Arfak Mts.), Bird's Head, New Guinea	NRM 572142	toepad	MK286099	This study
Melanorectes nigrescens wandamensis	Wondiwoi, Bird's Neck, New Guinea	AMNH 294178	toepad	MK286100	This study
Melanorectes nigrescens wandamensis	Wondiwoi, Bird's Neck, New Guinea	AMNH 656570	toepad	MK286101	This study
Melanorectes nigrescens meeki	Weylandgeb, New Guinea	AMNH 302321	toepad	MK286102	This study
Melanorectes nigrescens meeki	Utakwa River, Dutch New Guinea	BMNH 1916.5.30.96	toepad	MK286103	This study
Melanorectes nigrescens buergersi	Mt Wilhelm, Eastern Ranges, New Guinea	NHMD 138662	fresh tissue	MK286104	This study
Melanorectes nigrescens buergersi	Mt Wilhelm, Eastern Ranges, New Guinea	NHMD 165125	fresh tissue	MK286105	This study
Melanorectes nigrescens harterti	Yupna Valley, Nokopo Village, Madang Province, New Guinea	JPD 93010	fresh tissue	EF592321	Dumbacher et al. 2008
Melanorectes nigrescens harterti	Yupna Valley, Nokopo Village, Madang Province, New Guinea	JPD 93009	fresh tissue	EF592320	Dumbacher et al. 2008
Melanorectes nigrescens schistaceus	Awoma Ridge, Gulf Province, New Guinea	ANWC B26846	fresh tissue	GQ494090	Jønsson et al. 2010
Melanorectes nigrescens schistaceus	Boneno, Mt. Mura, 30 miles n.w. of Mt. Simpson, New Guinea	BMNH 1970.2.36	toepad	MK286106	This study
